# Supplementary material for: Diagnostic criteria of anterior segment swept-source optical coherence tomography to detect gonioscopic angle closure
Source: PubMed Central journal article supplement — Br J Ophthalmol. 2024 Apr 9;108(8):1130–6. doi: 10.1136/bjo-2023-323860 (PMC11287563; doi:10.1136/bjo-2023-323860), 2024-04-09
Supplement: bjo-2023-323860supp001.pdf [file bjo-2023-323860supp001.pdf]

**Figure S1. Association between anterior chamber angle width and age** Scatter plots between age and angle opening distance (AOD) / trabecular space iris area (TISA) measured at 500µm from the scleral spur in 394 healthy subjects <50 years (n=232) (A) or ≥ 50 years (n=162) (B) enrolled in Phase II.

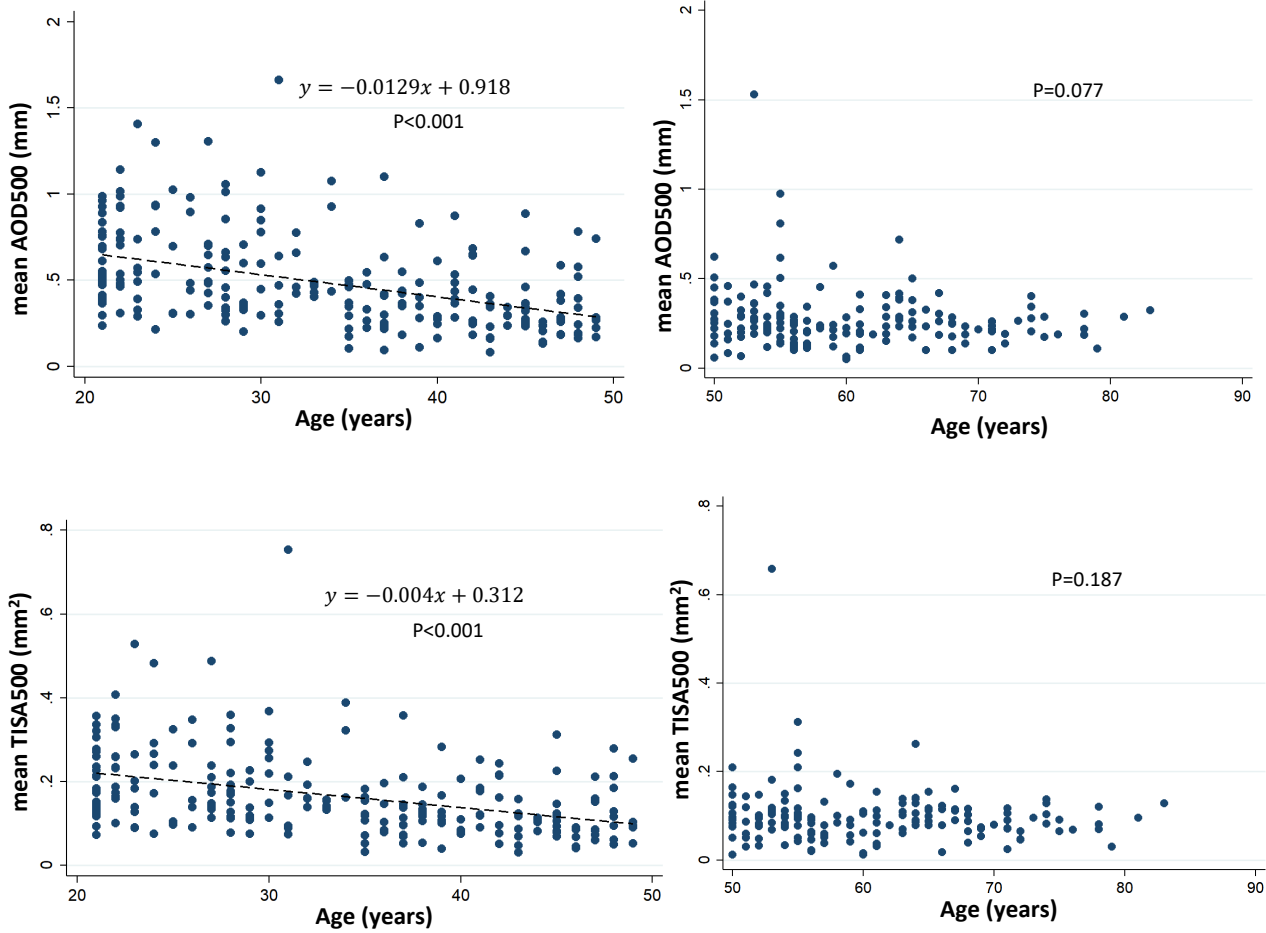

**Figure S2** Associations of axial length (A), and anterior chamber depth (B) with age in 394 healthy subjects included in the normative dataset below 50 years (left panel, n=232) and at or above 50 years (right panel, n=162)

(A)

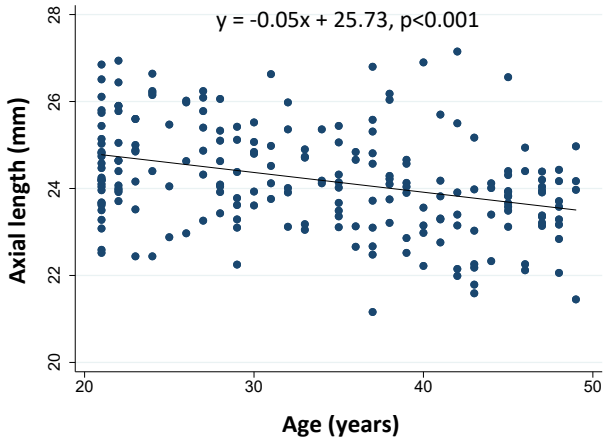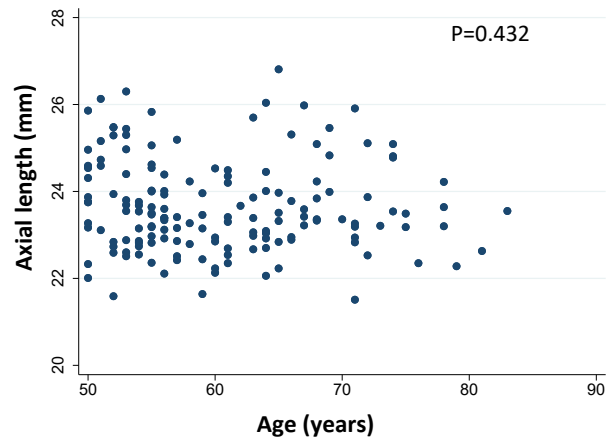

(B)

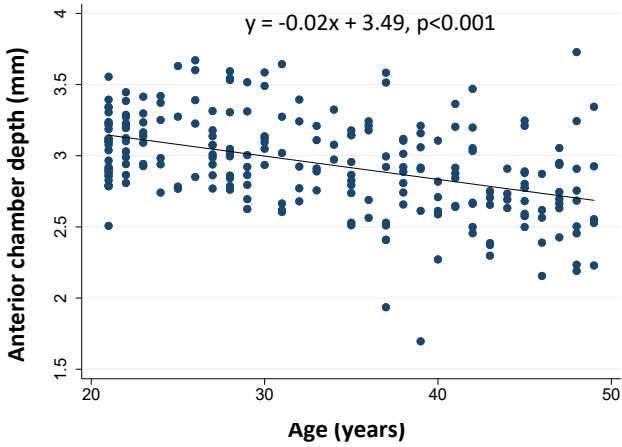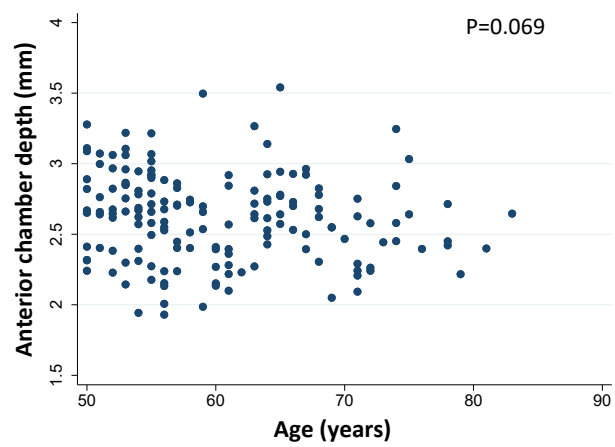

**Figure S3. Box plots of the angle opening distance (AOD500) (A) and trabecular space iris area (TISA500) (B) measured at 500 $\mu$ m from the scleral spur by age and gender.**

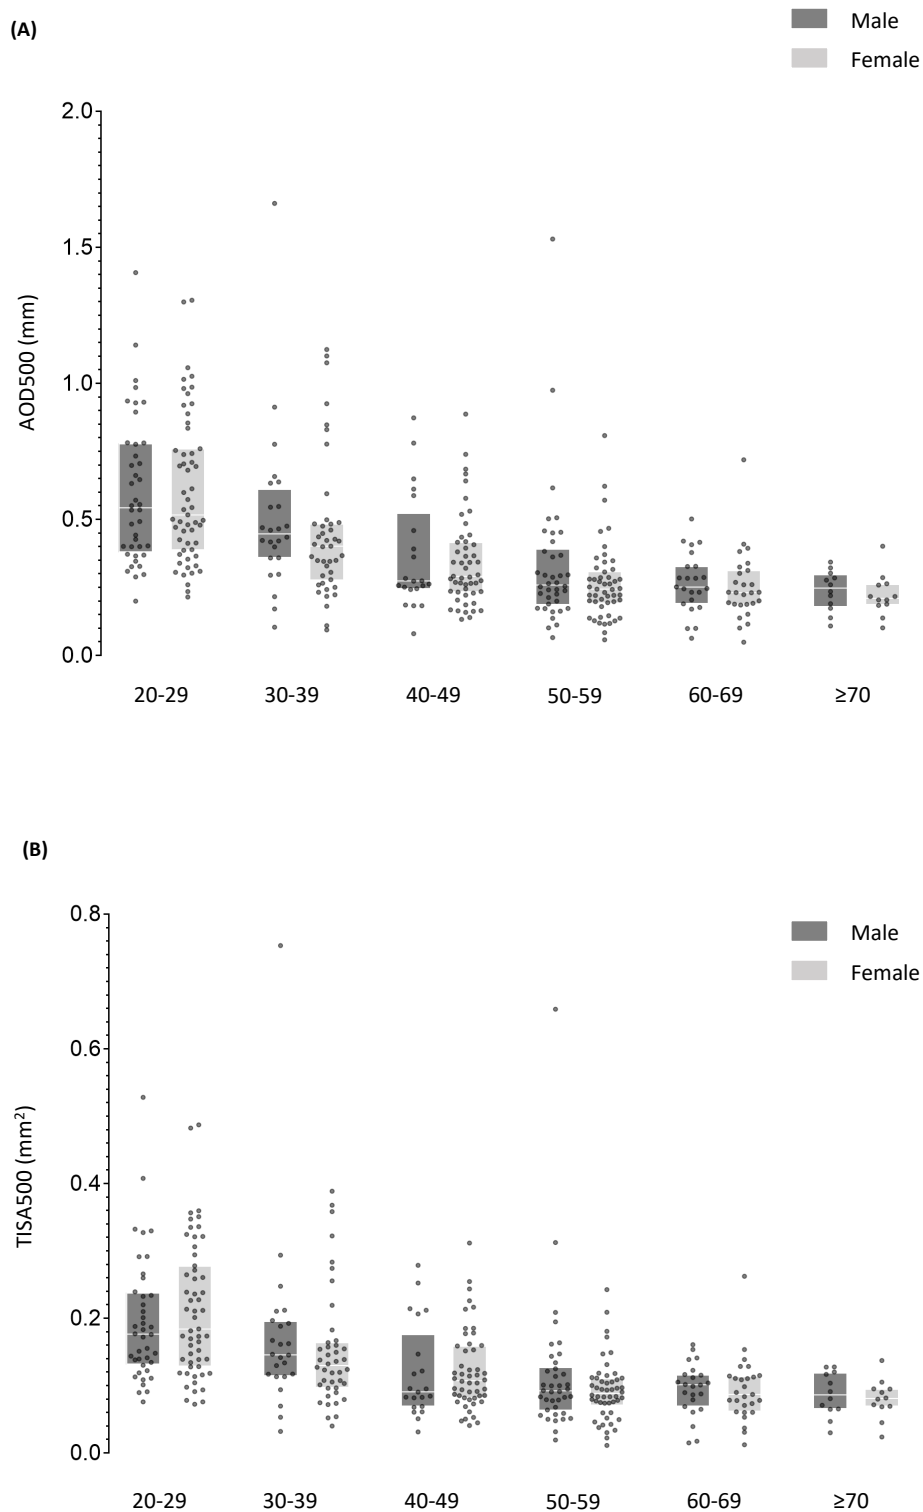

**Figure S4 Distribution of age (A), AOD500 (B), and TISA500 (C) of the test dataset**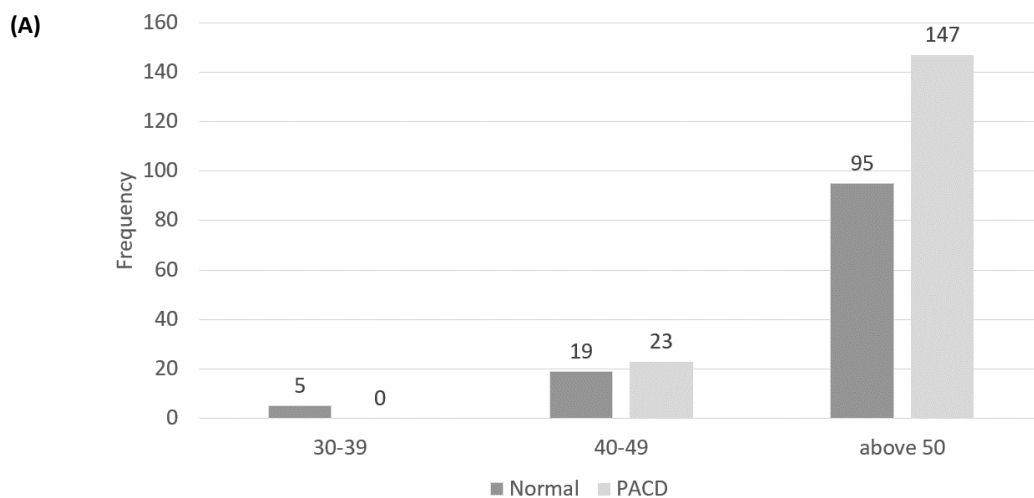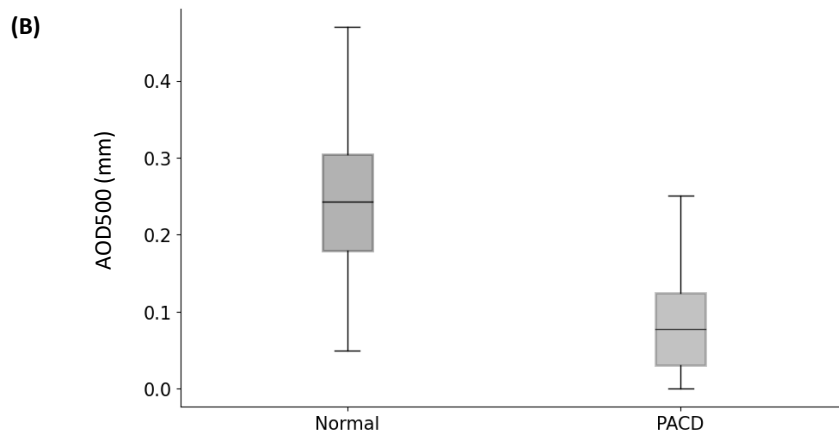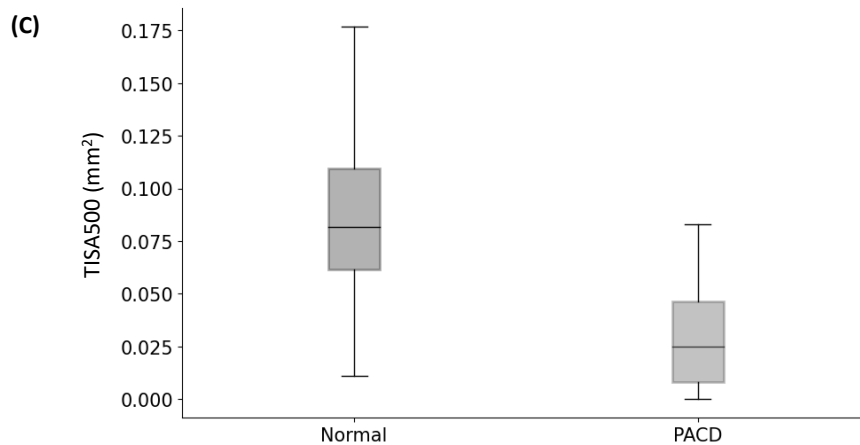

BMJ Publishing Group Limited (BMJ) disclaims all liability and responsibility arising from any reliance on the content of this preprint. This preprint reports on an unverified analysis and should not be used to guide clinical practice.

**Figure S5 Diagnostic performance of narrow angle thresholds (the 5<sup>th</sup> and 10<sup>th</sup> percentiles of AOD500/TISA500) versus ITC500 for discrimination between gonioscopic open-angle and gonioscopic angle-closure in the age group 40-49 years.** The area under the receiver operating characteristic curve (ROC) was compared using ROC regression analysis with adjustment for age and axial length.

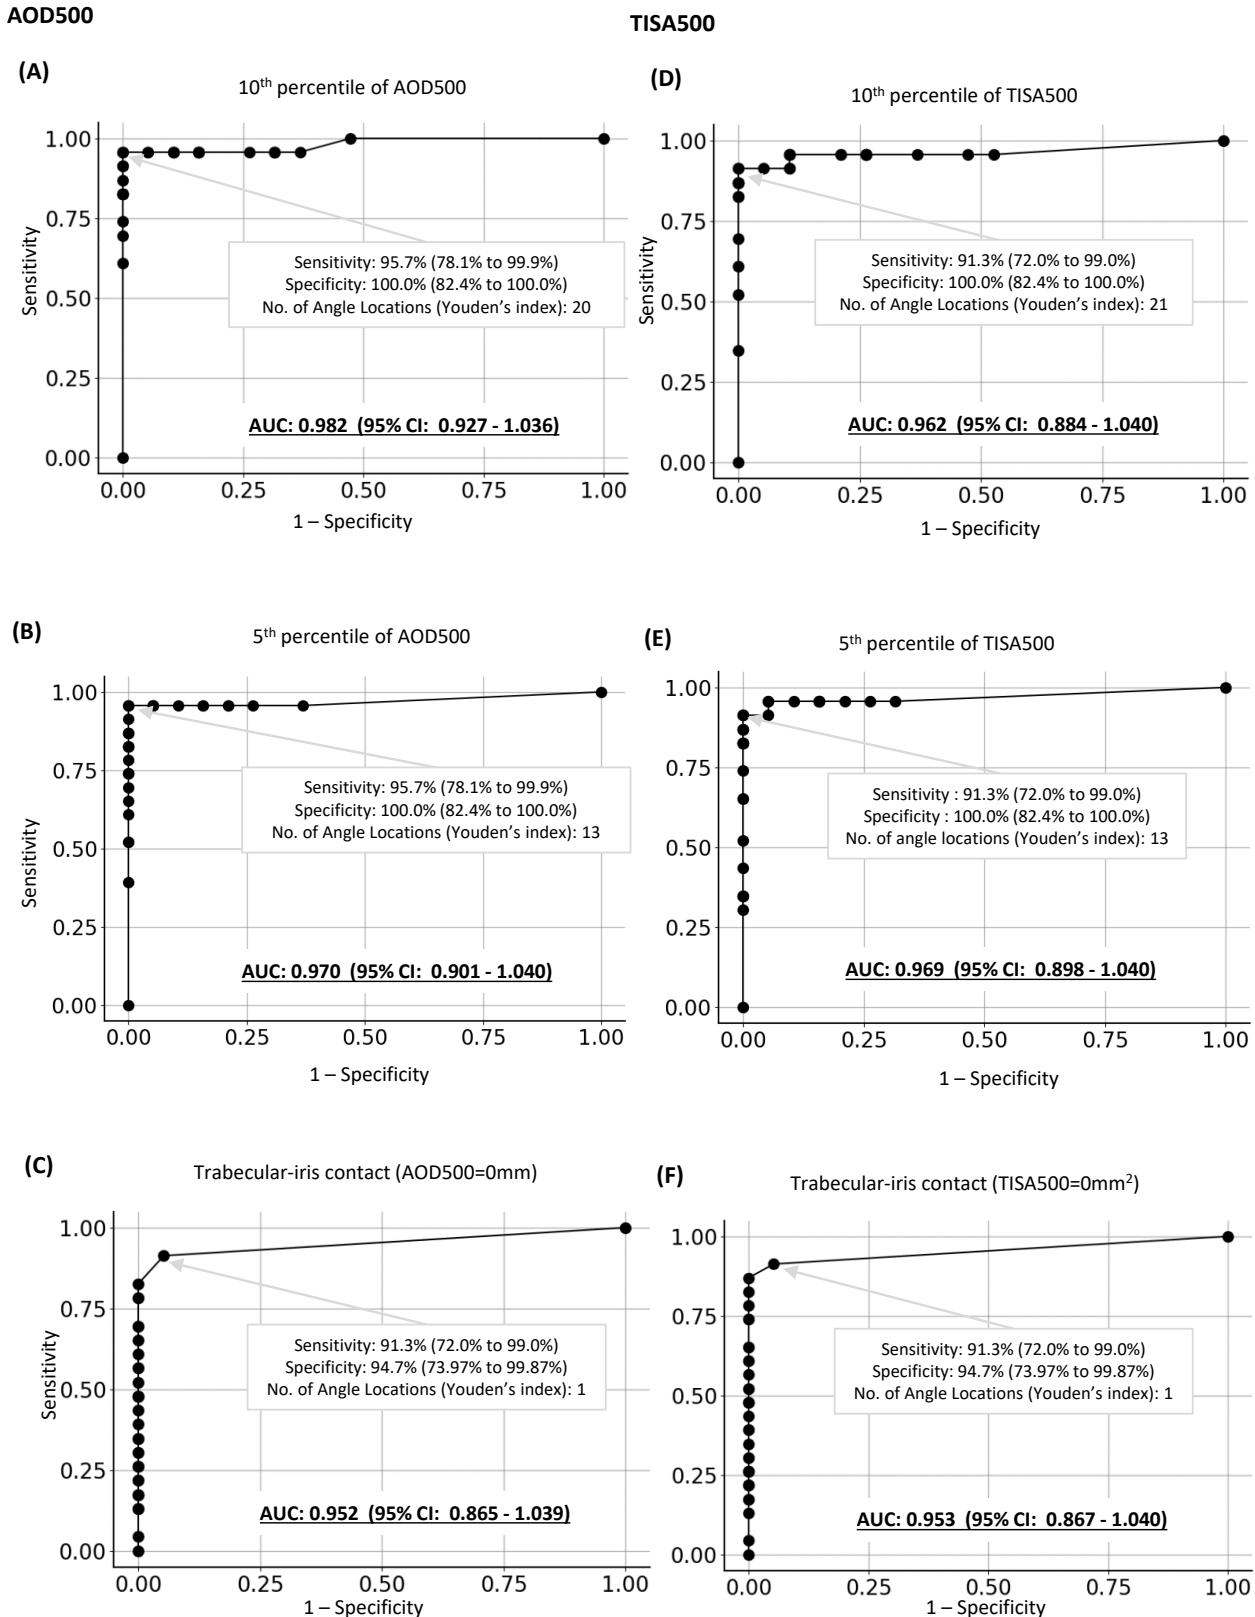

**Figure S6 Diagnostic performance of narrow angle thresholds (the 5<sup>th</sup> and 10<sup>th</sup> percentiles of AOD500/TISA500) versus ITC500 for discrimination between gonioscopic open-angle and gonioscopic angle-closure in the age group  $\geq 50$  years.** The area under the receiver operating characteristic curve (ROC) was compared using ROC regression analysis with adjustment for age and axial length.

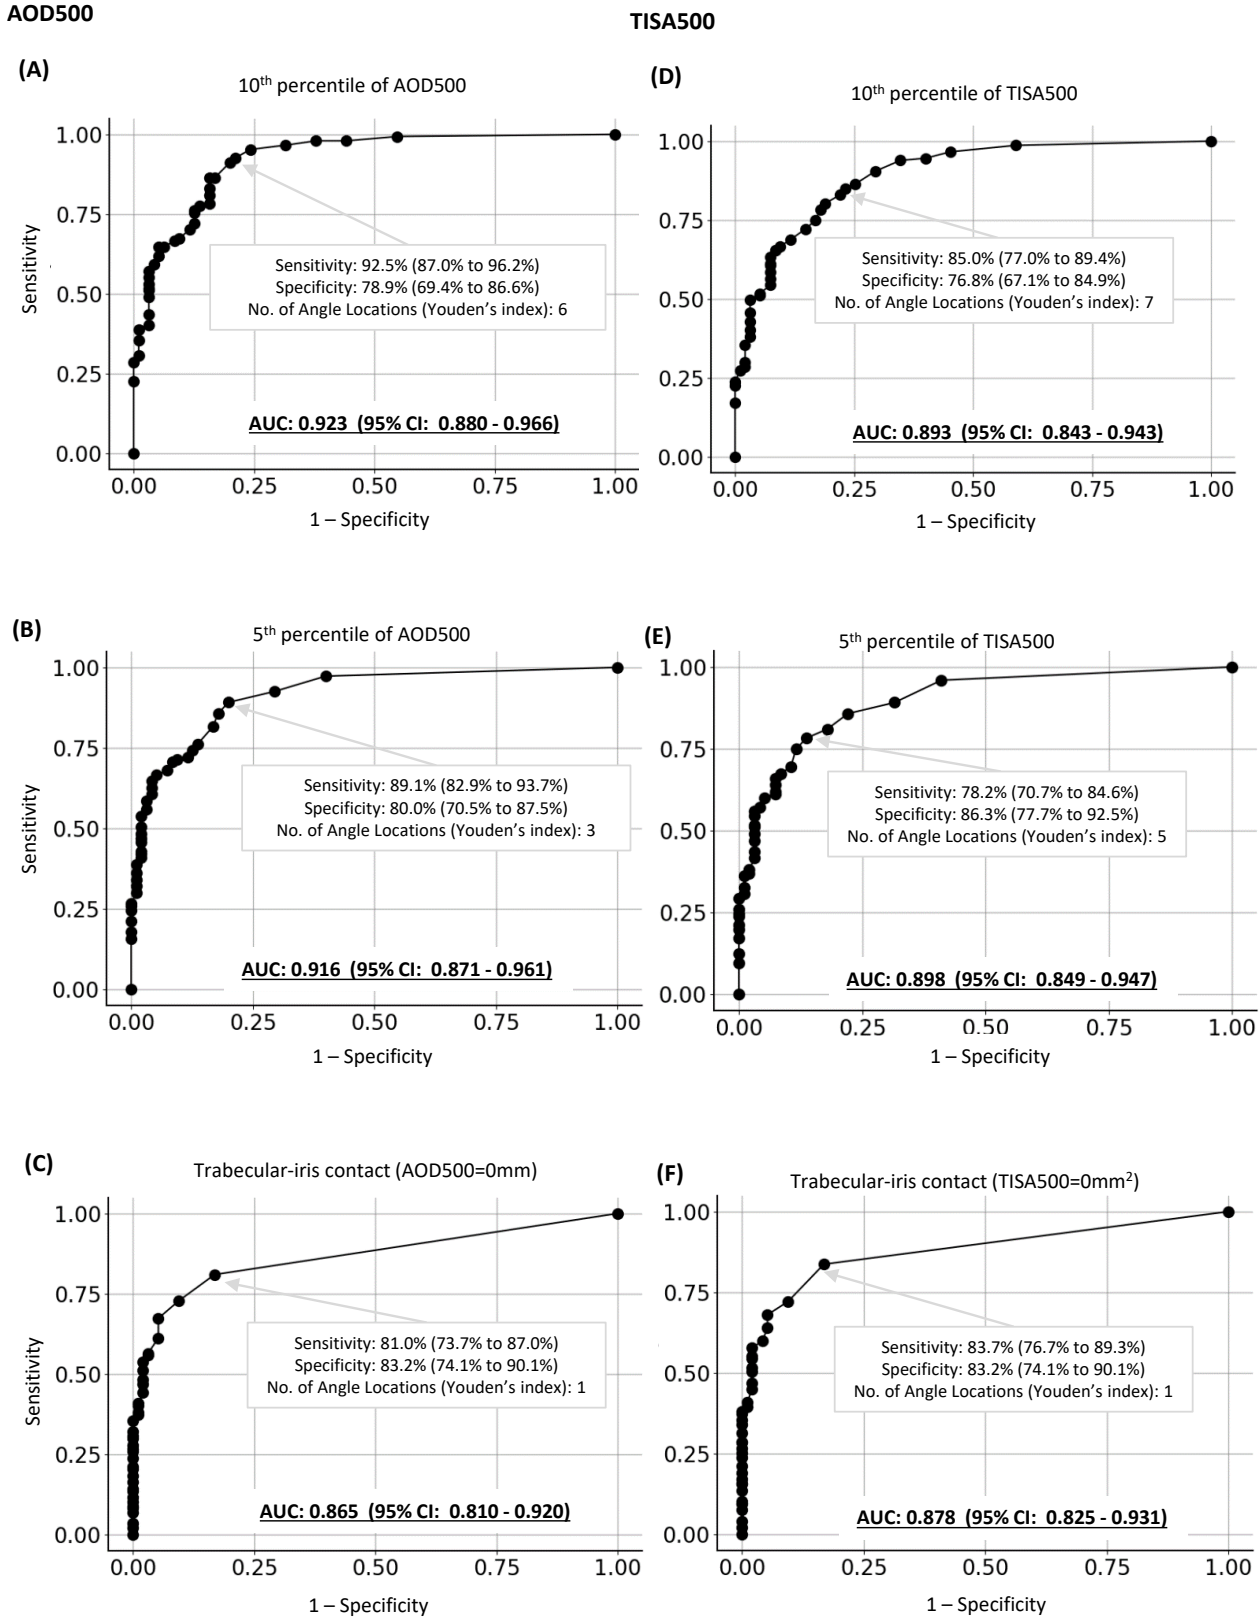

area under the receiver operating characteristic curve (ROC) was compared using ROC regression analysis with adjustment for age and axial length.

**AOD500**

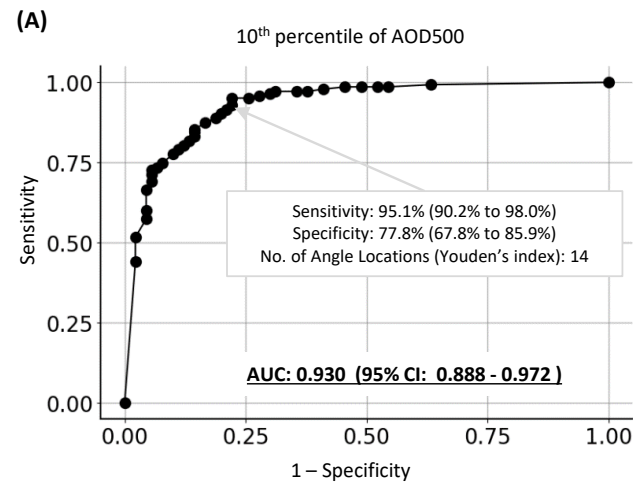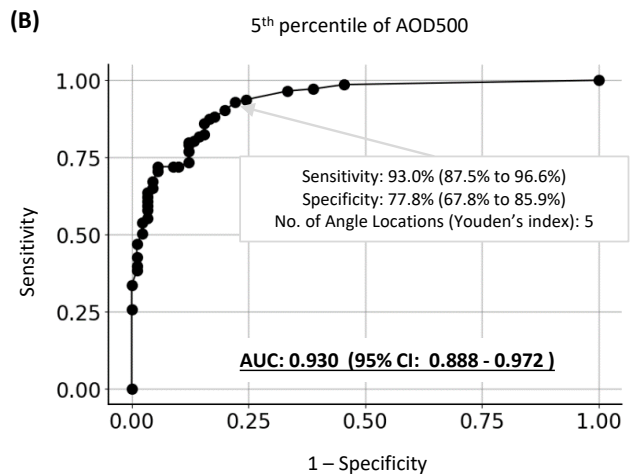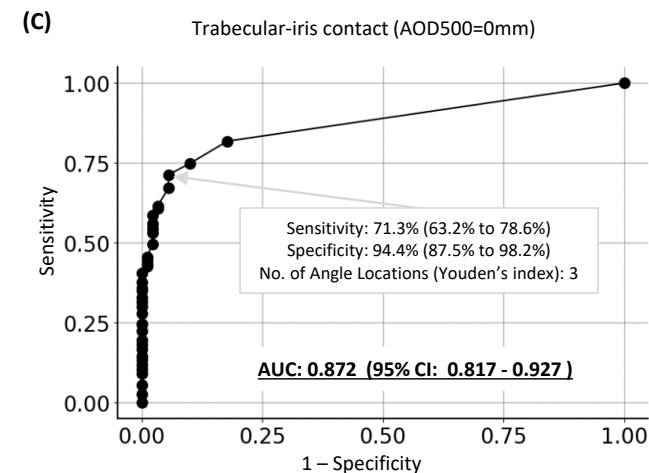

**TISA500**

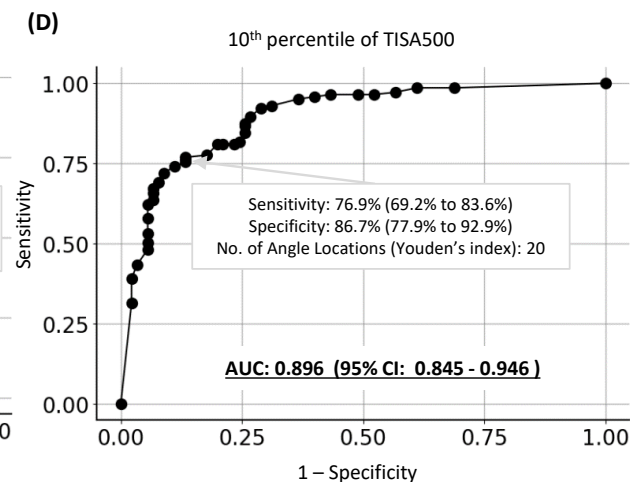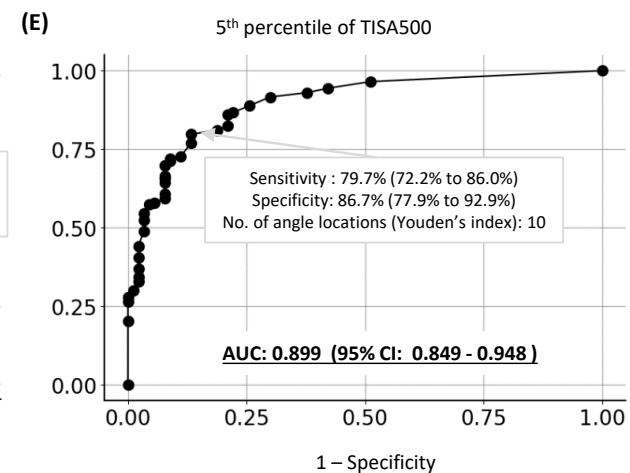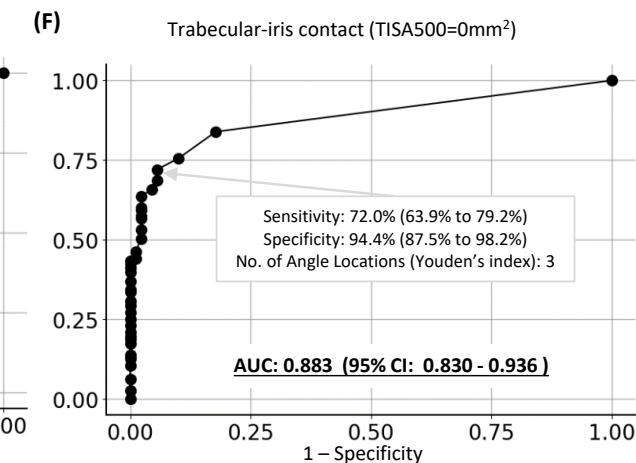

**Figure S8 Diagnostic performance of narrow angle thresholds (the 5<sup>th</sup> and 10<sup>th</sup> percentiles of AOD500/TISA500) versus ITC500 for discrimination between gonioscopic open-angle and gonioscopic angle-closure in non-Asians.** The area under the receiver operating characteristic curve (ROC) was compared using ROC regression analysis with adjustment for age and axial length.

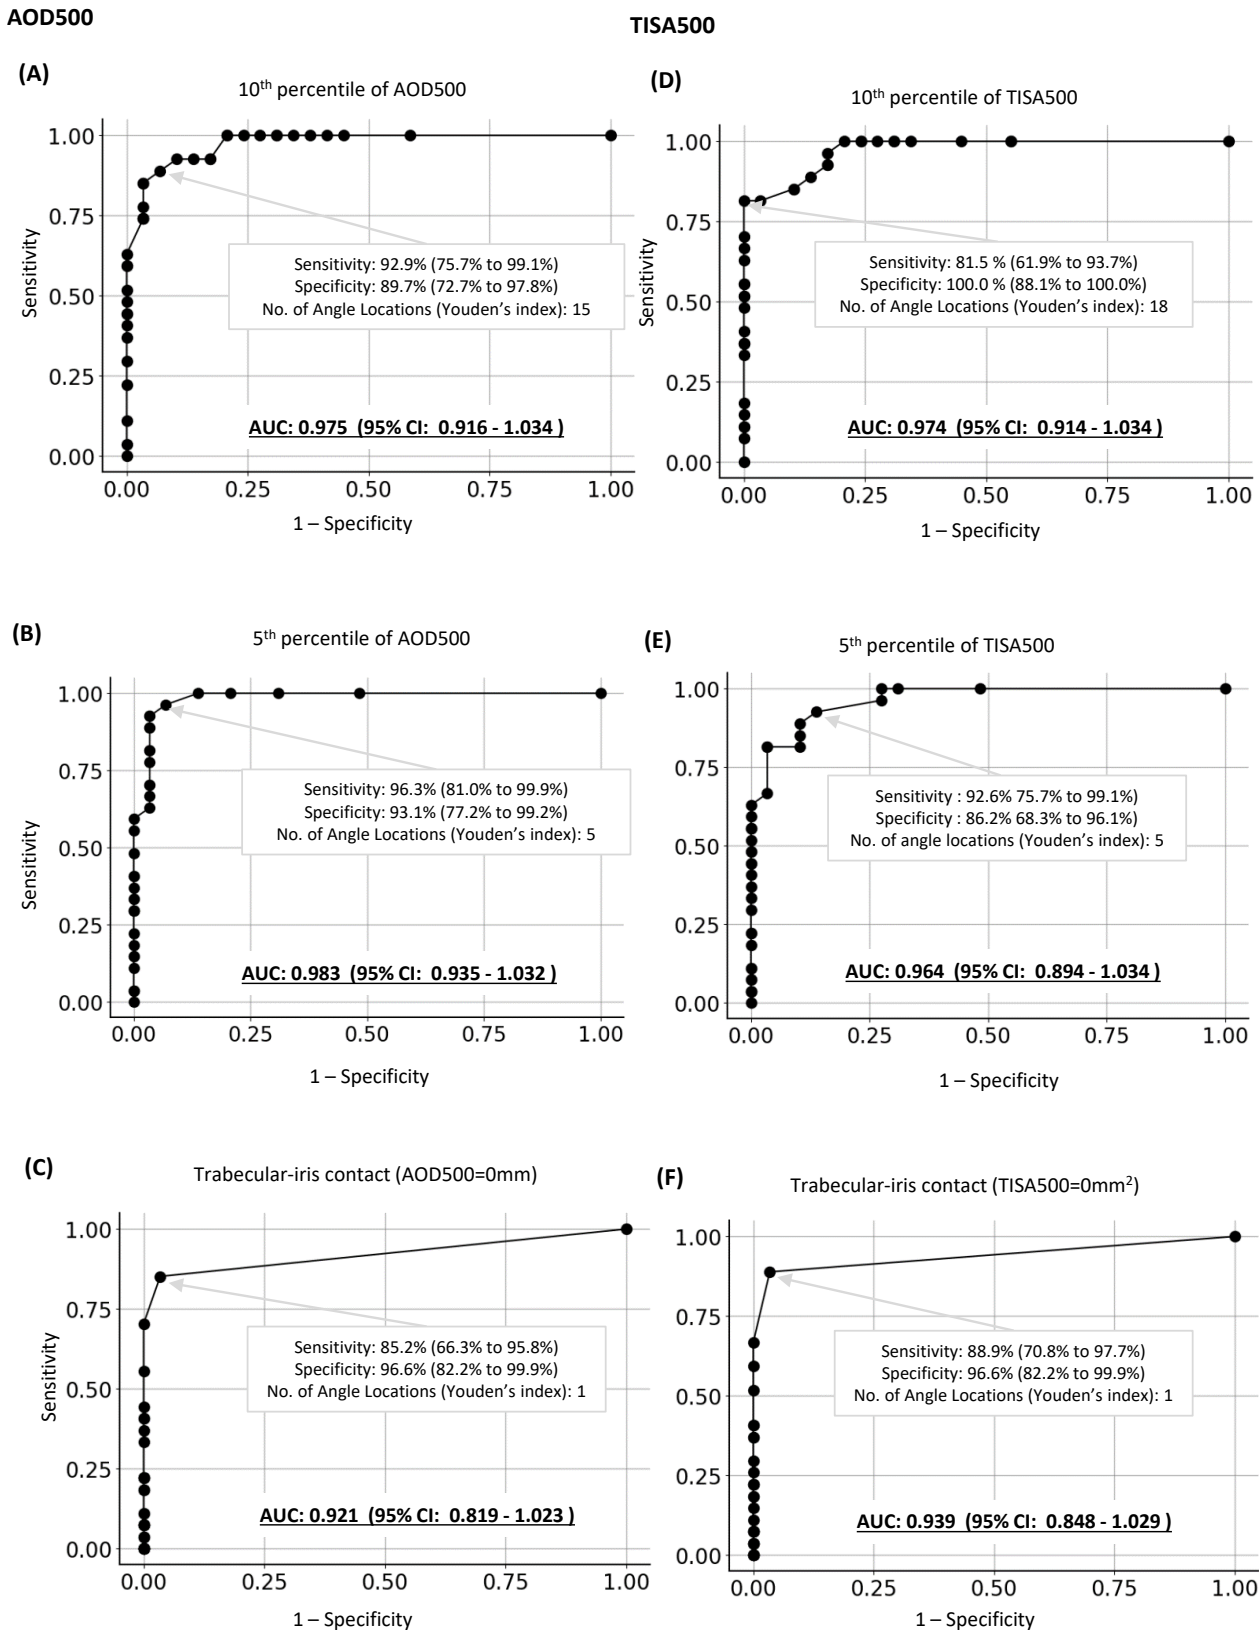



**Table S1 Comparison of the angle opening distance (AOD500) (A) trabecular space iris area (TISA500) measured at 500µm from the scleral spur between gender in each age group.**

| <b>AOD500</b>  |                        |                        |          |
|----------------|------------------------|------------------------|----------|
|                | <b>Male</b>            | <b>Female</b>          | <b>P</b> |
| <b>20-29</b>   | 0.601 (0.515 to 0.688) | 0.605 (0.532 to 0.679) | 0.945    |
| <b>30-39</b>   | 0.506 (0.377 to 0.636) | 0.451 (0.371 to 0.531) | 0.429    |
| <b>40-49</b>   | 0.367 (0.270 to 0.464) | 0.343 (0.286 to 0.391) | 0.620    |
| <b>≥50</b>     | 0.296 (0.248 to 0.343) | 0.255 (0.228 to 0.282) | 0.124    |
| <b>TISA500</b> |                        |                        |          |
|                | <b>Male</b>            | <b>Female</b>          | <b>P</b> |
| <b>20-29</b>   | 0.197 (0.166 to 0.227) | 0.212 (0.185 to 0.239) | 0.449    |
| <b>30-39</b>   | 0.175 (0.117 to 0.233) | 0.153 (0.125 to 0.180) | 0.412    |
| <b>40-49</b>   | 0.119 (0.087 to 0.152) | 0.122 (0.105 to 0.139) | 0.852    |
| <b>≥50</b>     | 0.105 (0.086 to 0.124) | 0.091 (0.082 to 0.101) | 0.182    |

**Table S2** Demographics and anterior chamber angle with measurements of 394 healthy subjects in the normative dataset (mean  $\pm$  SD)

|                                 | All               | 20-29 years       | 30-39 years       | 40-49 years       | $\geq 50$ years   |
|---------------------------------|-------------------|-------------------|-------------------|-------------------|-------------------|
| <b>No. of Subjects</b>          | 394               | 95                | 66                | 71                | 162               |
| <b>Gender (M/F)</b>             | 158/236           | 40/55             | 24/42             | 21/50             | 73/89             |
| <b>Age (years)</b>              | 44.4 $\pm$ 15.7   | 24.1 $\pm$ 2.9    | 34.9 $\pm$ 2.9    | 44.6 $\pm$ 2.8    | 60.2 $\pm$ 7.9    |
| <b>SE (D)</b>                   | -1.09 $\pm$ 2.28  | -2.44 $\pm$ 2.14  | -1.93 $\pm$ 2.07  | -0.65 $\pm$ 1.85  | 0.06 $\pm$ 1.99   |
| <b>AL (mm)</b>                  | 23.98 $\pm$ 1.17  | 24.63 $\pm$ 1.14  | 24.25 $\pm$ 1.07  | 23.64 $\pm$ 1.15  | 23.66 $\pm$ 1.06  |
| <b>ACD (mm)</b>                 | 2.81 $\pm$ 0.36   | 2.93 $\pm$ 0.36   | 2.93 $\pm$ 0.36   | 2.75 $\pm$ 0.31   | 2.62 $\pm$ 0.31   |
| <b>AOD500 (mm)</b>              | 0.400 $\pm$ 0.271 | 0.604 $\pm$ 0.295 | 0.471 $\pm$ 0.29  | 0.350 $\pm$ 0.198 | 0.273 $\pm$ 0.181 |
| <b>TISA500 (mm<sup>2</sup>)</b> | 0.138 $\pm$ 0.099 | 0.205 $\pm$ 0.109 | 0.161 $\pm$ 0.113 | 0.121 $\pm$ 0.07  | 0.097 $\pm$ 0.070 |

SE: spherical equivalent; AL: axial length; ACD; anterior chamber depth; PD: pupil diameter; AOD: angle opening distance; TISA: trabecular iris space area

**Table S3** Demographics of 119 healthy subjects with gonioscopic open angle and 170 primary angle closure disease (PACD) patients with gonioscopic angle closure enrolled in Phase I (mean  $\pm$  SD)

|                                 | Healthy           | PACD              | P      |
|---------------------------------|-------------------|-------------------|--------|
| <b>No. of Subjects</b>          | 119               | 170               | -      |
| <b>Gender (M/F)</b>             | 47/72             | 48/122            | 0.045  |
| <b>Age (years)</b>              | 60.8 $\pm$ 12.1   | 63.5 $\pm$ 10.5   | 0.046  |
| <b>SE (D)</b>                   | +0.6 $\pm$ 1.7    | +1.1 $\pm$ 1.5    | 0.016  |
| <b>AL (mm)</b>                  | 23.7 $\pm$ 1.0    | 22.8 $\pm$ 0.9    | <0.001 |
| <b>ACD (mm)</b>                 | 2.6 $\pm$ 0.3     | 2.1 $\pm$ 0.3     | <0.001 |
| <b>PD (mm)</b>                  | 4.9 $\pm$ 1.1     | 4.7 $\pm$ 0.9     | 0.078  |
| <b>AOD500 (mm)</b>              | 0.267 $\pm$ 0.157 | 0.081 $\pm$ 0.079 | <0.001 |
| <b>TISA500 (mm<sup>2</sup>)</b> | 0.092 $\pm$ 0.029 | 0.029 $\pm$ 0.034 | <0.001 |

SE: spherical equivalent; AL: axial length; ACD: anterior chamber depth; PD: pupil diameter; AOD: angle opening distance; TISA: trabecular iris space area; PACD: primary angle closure disease; PACS: primary angle closure suspect; PAC; primary angle closure; PACG: primary angle closure glaucoma

**Table S4 Cross tabulation of the AS-OCT results by the results of gonioscopy for the three sets of AS-OCT diagnostic criteria**

|                                        | AOD500=0mm<br>(≥1 angle location)            |     | Below the 5th percentile of<br>AOD500 (≥4 angle locations)  |     | Below the 10th percentile<br>of AOD500 (≥9 locations) |     |
|----------------------------------------|----------------------------------------------|-----|-------------------------------------------------------------|-----|-------------------------------------------------------|-----|
|                                        | Yes                                          | No  | Yes                                                         | No  | Yes                                                   | No  |
| <b>Angle closure<br/>by gonioscopy</b> | 140                                          | 30  | 148                                                         | 22  | 149                                                   | 21  |
| <b>Open angle by<br/>gonioscopy</b>    | 17                                           | 102 | 21                                                          | 98  | 18                                                    | 101 |
|                                        | TISA=0mm <sup>2</sup><br>(≥1 angle location) |     | Below the 5th percentile of<br>TISA500 (≥5 angle locations) |     | Below the 10th percentile<br>of TISA500(≥7 locations) |     |
|                                        | Yes                                          | No  | Yes                                                         | No  | Yes                                                   | No  |
| <b>Angle closure<br/>by gonioscopy</b> | 144                                          | 26  | 137                                                         | 33  | 147                                                   | 23  |
| <b>Open angle by<br/>gonioscopy</b>    | 17                                           | 102 | 16                                                          | 103 | 27                                                    | 92  |
